# Supplementary material for: Impacts of Combined Exposure to Glyphosate and Diquat on Microbial Community Structure and Diversity in a Lateritic Paddy Soil
Source: Preprints.org preprint supplement (doi:10.20944/preprints202304.0851.v1), 2023-04-24
Supplement: Supplementary file 1 [file supplementary]

Impacts of exposure to glyphosate and diquat on microbial diversity and community structure shifts in a lateritic paddy soil

Xiaoyu He1, 2, Chunyuan Wu2, 3, 4, 5, Huadong Tan 2, 3, 4, 5*, Xiao Deng2, 3, 4, 5*, Yi Li 2, 3, 4, 5

1 National Key Laboratory of Green Pesticide, Key Laboratory of Green Pesticide and Agricultural Bioengineering, Ministry of Education, Center for R&D of Fine Chemicals of Guizhou University, Guiyang 550025, PR China.

2 Environment and Plant Protection Institute, Chinese Academy of Tropical Agricultural Sciences, Haikou 571101, PR China.

3 Danzhou Scientific Observing and Experimental Station of Agro-Environment, Ministry of Agriculture and Rural Affairs, Danzhou 571737, PR China.

4 National Agricultural Experimental Station for Agricultural Environment, Danzhou 571737, PR China.

5 Hainan Engineering Research Center for Non-point Source and Heavy Metal Pollution Control, Danzhou 571737, PR China.

***** Correspondence: Huadong Tan, Environment and Plant Protection Institute, Chinese Academy of Tropical Agricultural Sciences, Haikou, China; E-mail: [tanhuadong1991@163.com;](mailto:tanhuadong1991@163.com;) Xiao Deng, Environment and Plant Protection Institute, Chinese Academy of Tropical Agricultural Sciences, Haikou, China; E-mail: dx0928@qq.com.

**Table S1** Primer information

| Type | Region | Primer name | Primer sequence | Product length | Reference |
| --- | --- | --- | --- | --- | --- |
| 16S | V1-V9 | 27F | AGRGTTTGATYNTGGCTCAG | ~1465 | [1] |
| 1492R | TASGGHTACCTTGTTASGACTT |
| V4 | 515F | GTGYCAGCMGCCGCGGTAA | ~292 | [1-2] |
| 806R | GGACTACNVGGGTWTCTAAT |
| V3-V4 | 341F | CCTACGGGNGGCWGCAG | ~466 | [3] |
| 806R | GGACTACHVGGGTATCTAAT |
| V4-V5 | 515F | GTGCCAGCMGCCGCGGTAA | ~412 | [4] |
| 907R | CCGTCAATTCCTTTGAGTTT |
| V5-V7 | 799F | AACMGGATTAGATACCCKG | ~414 | [5] |
| 1193R | ACGTCATCCCCACCTTCC |
| V4-V5 | Arch519F | CAGCMGCCGCGGTAA | ~416 | [6] |
| Arch915R | GTGCTCCCCCGCCAATTCCT |
| 18S | V4 | 528F | GCGGTAATTCCAGCTCCAA | ~260 | [7] |
| 706R | AATCCRAGAATTTCACCTCT |
| ITS | ITS1 | ITS1_F_KYO2 | TAGAGGAAGTAAAAGTCGTAA | ~366 | [8] |
| ITS86R | TTCAAAGATTCGATGATTCAC |
| ITS1-F | CTTGGTCATTTAGAGGAAGTAA | ~321 | [9] |
| ITS2 | GCTGCGTTCTTCATCGATGC |
| ITS2 | ITS3_KYO2 | GATGAAGAACGYAGYRAA | ~381 | [10] |
| ITS4 | TCCTCCGCTTATTGATATGC |

**Reference**

[1] Singer, E.; Bushnell, B.; Coleman-Derr, D.; Bowman, B.; Bowers, R.M.; Levy, A.; Gies, E.A.; Cheng, J.F.; Copeland A.; Klenk H.P.; Hallam S J.; Hugenholtz P.; Tringe, S.G.; Woyke, T. High-resolution phylogenetic microbial community profiling. *ISME J*. **2016**, *10*, 2020-2032.

[2] Parada, A.E.; Needham, D.M.; Fuhrman, J.A. Every base matters: assessing small subunit rRNA primers for marine microbiomes with mock communities, time series and global field samples. *Environ. Microbiol*. **2016**, *18*, 1403–1414.

[3] Apprill, A.; McNally, S.; Parsons, R.; Weber, L. Minor revision to V4 region SSU rRNA 806R gene primer greatly increases detection of SAR11 bacterioplankton. *Aquat. Microb. Ecol*. **2015**, *75*, 129–137.

[4] Guo, M.; Wu F.; Hao, G.; Qi, Q.; Li, R.; Li N.; Wei L.M.; Chai T.J. Bacillus subtilis improves immunity and disease resistance in rabbits. *Front. Immunol*. **2017**, *8*, 354.

[5] Fazzini R.A.B; Levican, G.; Parada, P. Acidithiobacillus thiooxidans secretome containing a newly described lipoprotein Licanantase enhances chalcopyrite bioleaching rate. *Appl. Microbiol. Biot*. **2011**, *89*, 771-780.

[6] Beckers, B.; Op De Beeck, M.; Thijs, S.; Truyens, S.; Weyens, N.; Boerjan, W.; Vangronsveld, J. Performance of 16s rDNA Primer Pairs in the Study of Rhizosphere and Endosphere Bacterial Microbiomes in Metabarcoding Studies. *Front. Microbiol.* **2016**, *7*, 650.

[7] Teske A.; Sørensen K.B. Uncultured archaea in deep marine subsurface sediments: have we caught them all?. *ISME J*, **2008**, *2*, 3.

[8] Cheung, M.K.; Au, C.H.; Chu, K.H.; Kwan, H.S.; Wong, C.K. Composition and genetic diversity of picoeukaryotes in subtropical coastal waters as revealed by 454 pyrosequencing. *ISME J*, **2010**, *4*, 1053.

[9] Scibetta, S.; Schena, L.; Abdelfattah, A.; Pangallo, S.; Cacciola, S. O. Selection and experimental evaluation of universal primers to study the fungal microbiome of higher plants. *Phytobiomes J*. **2018**, *2*, 225- 236.

[10] Toju, H.; Tanabe, A. S.; Yamamoto, S.; & Sato, H. High-coverage ITS primers for the DNA-based identification of ascomycetes and basidiomycetes in environmental samples. *PloS one*, **2012**, *7*, e40863.


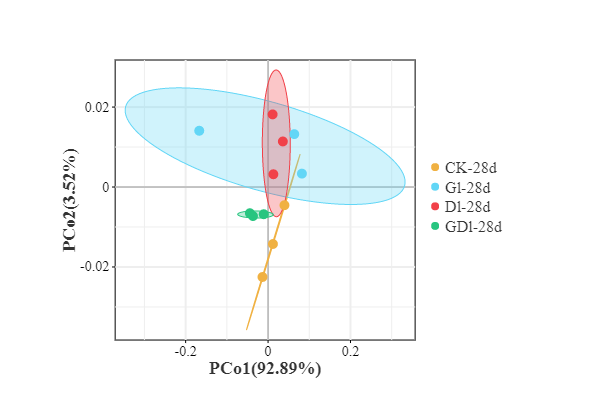

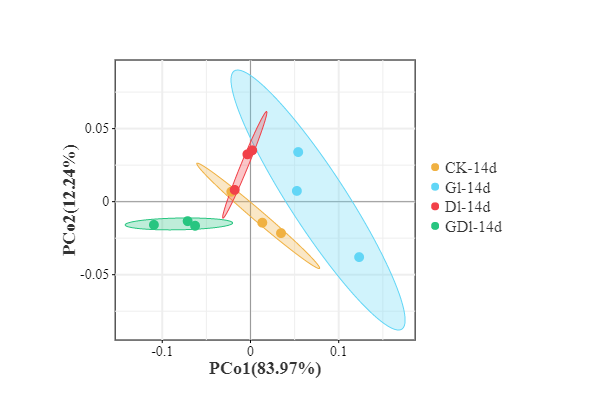

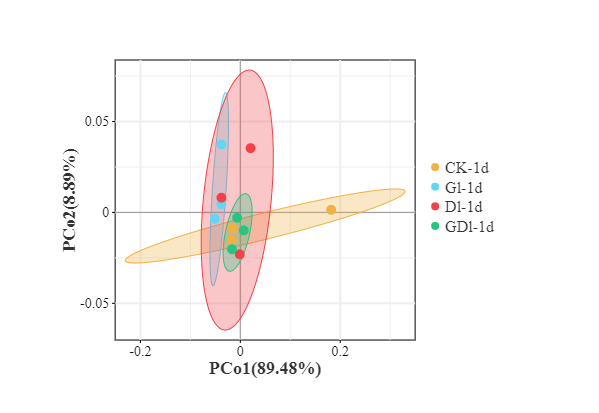


(a)

(b)

(c)

**Figure S1.** Principal coordinate analysis for the bacterial communities at the phylum level. .


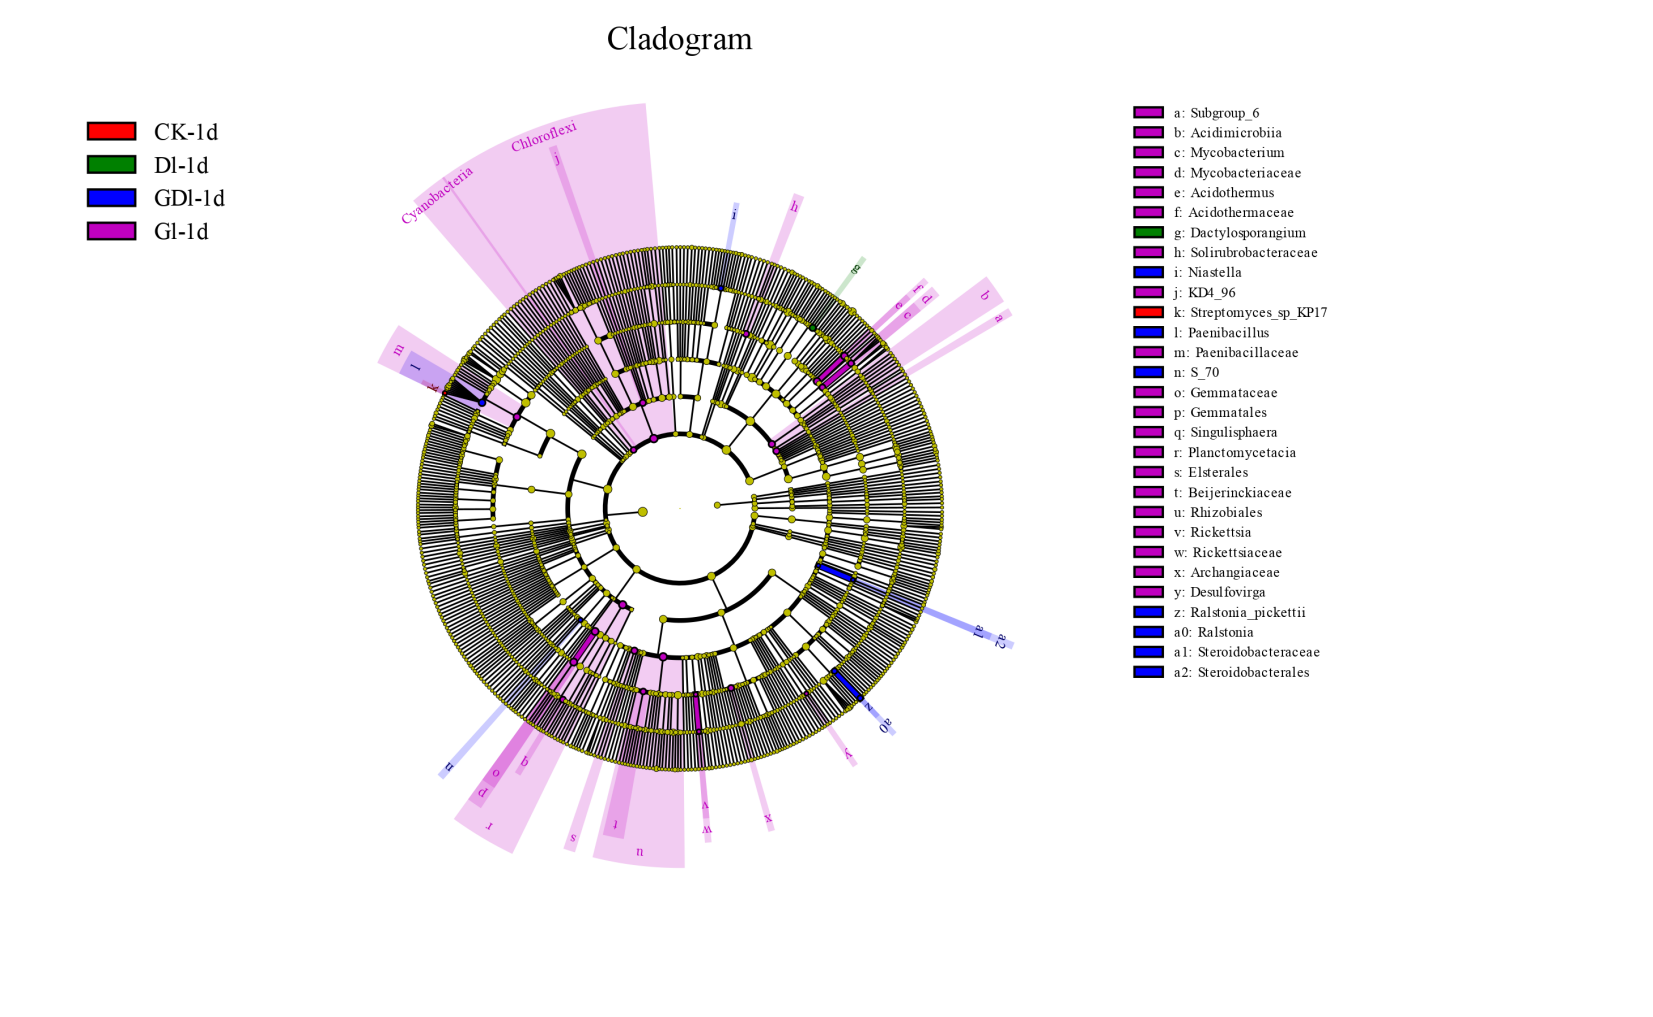


(a)

(b)


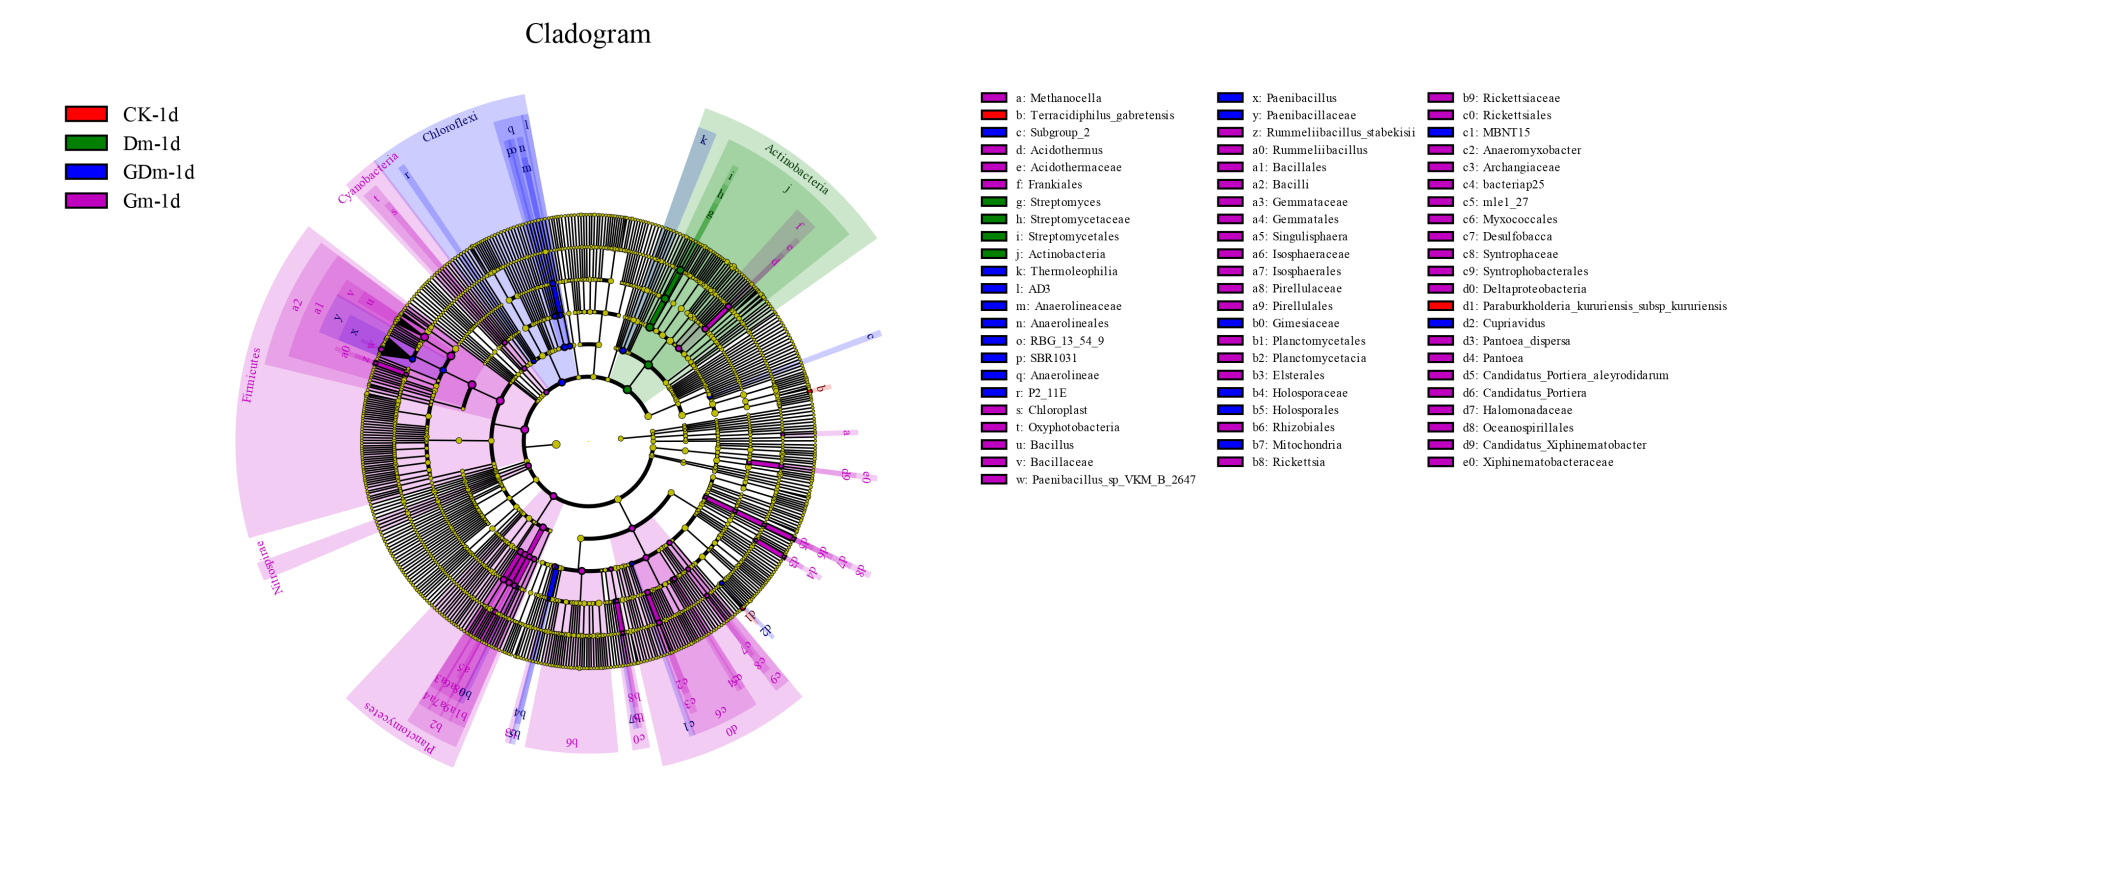

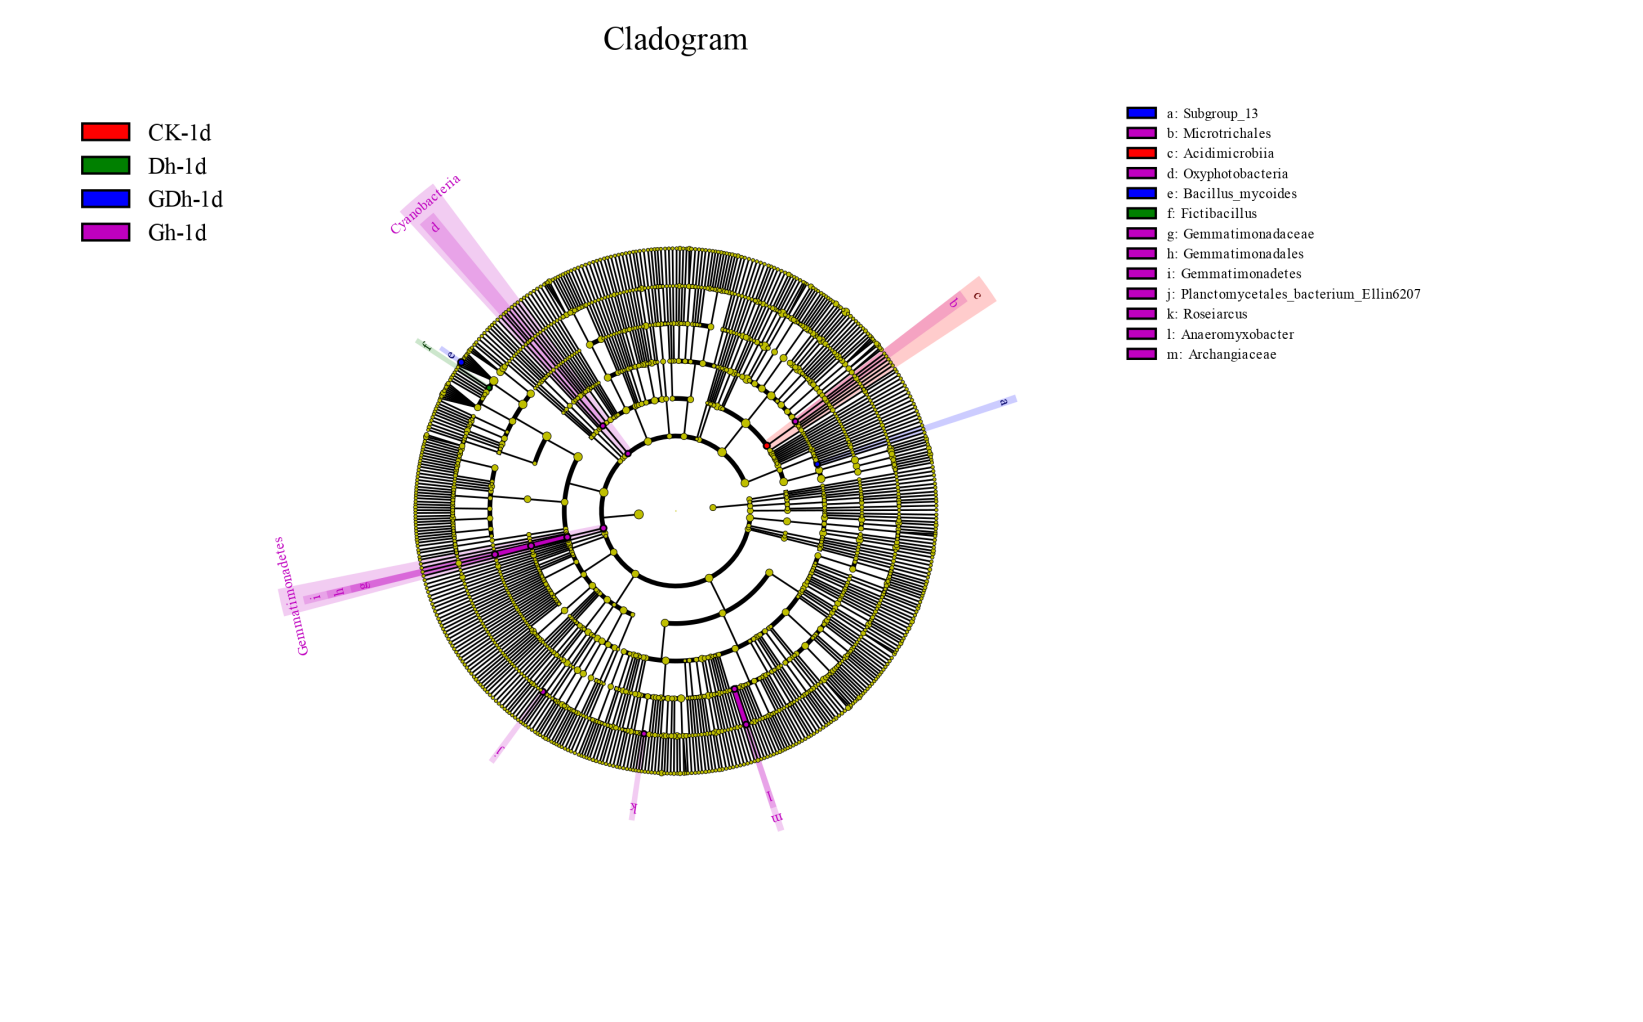


(c)


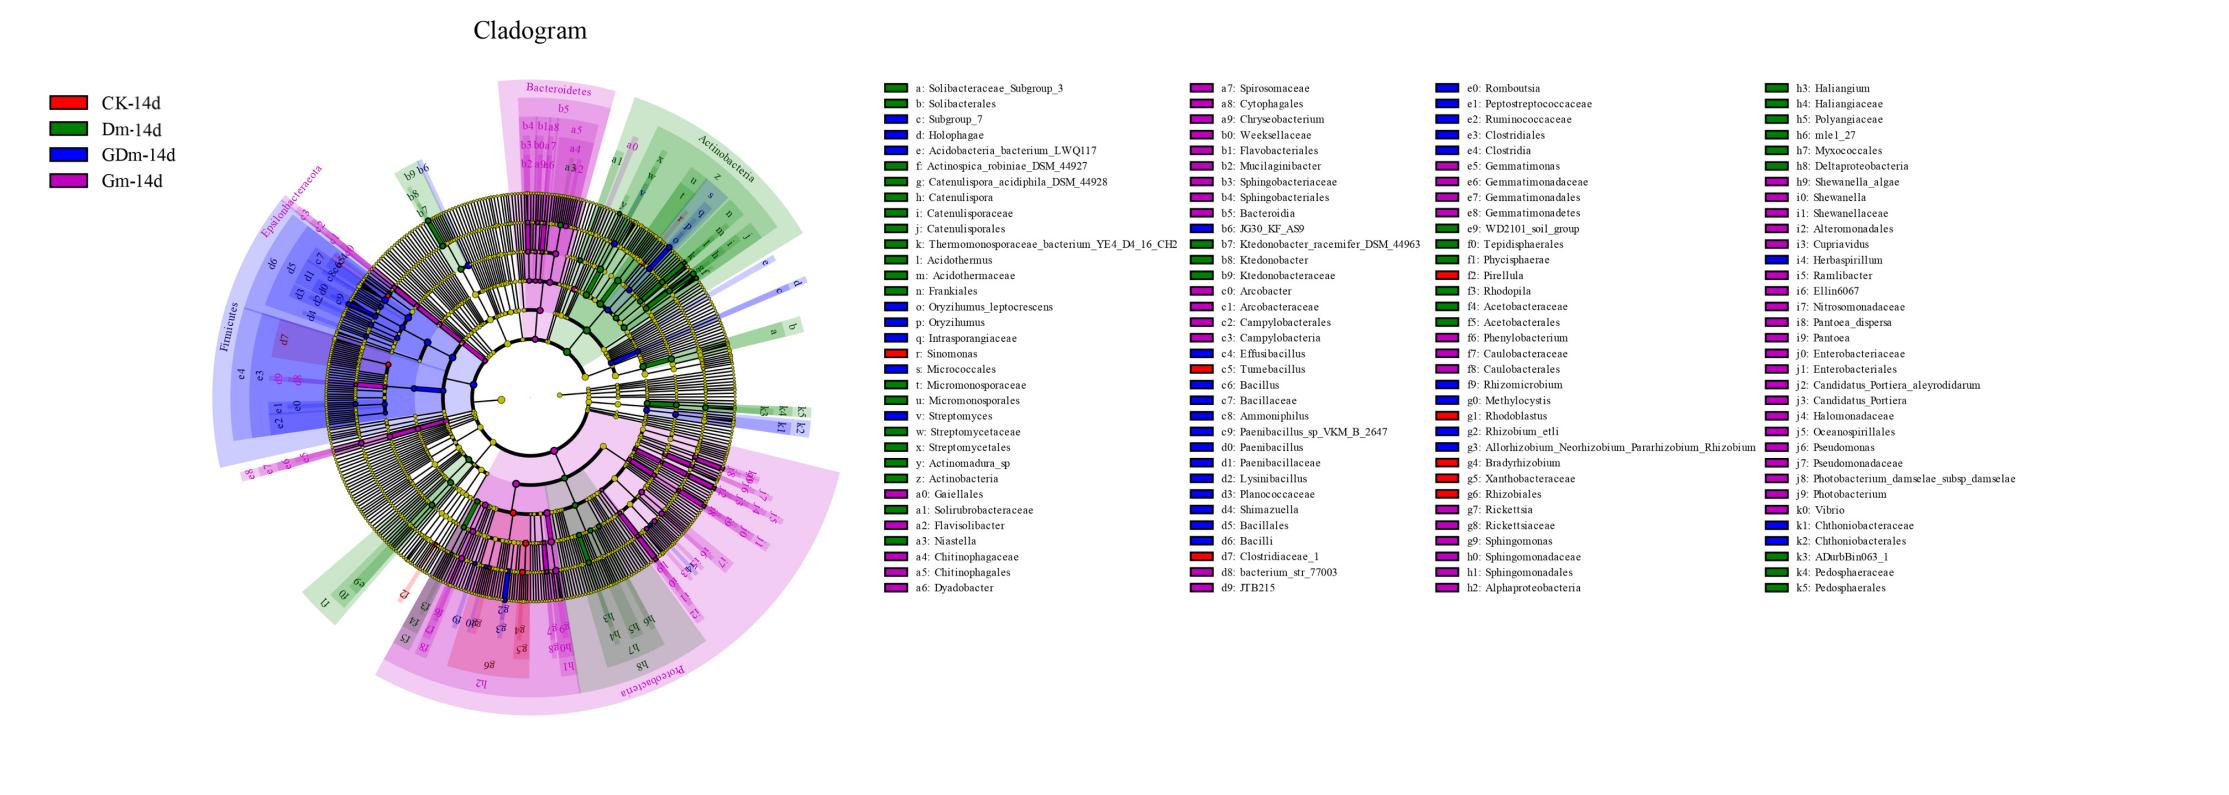


(d)


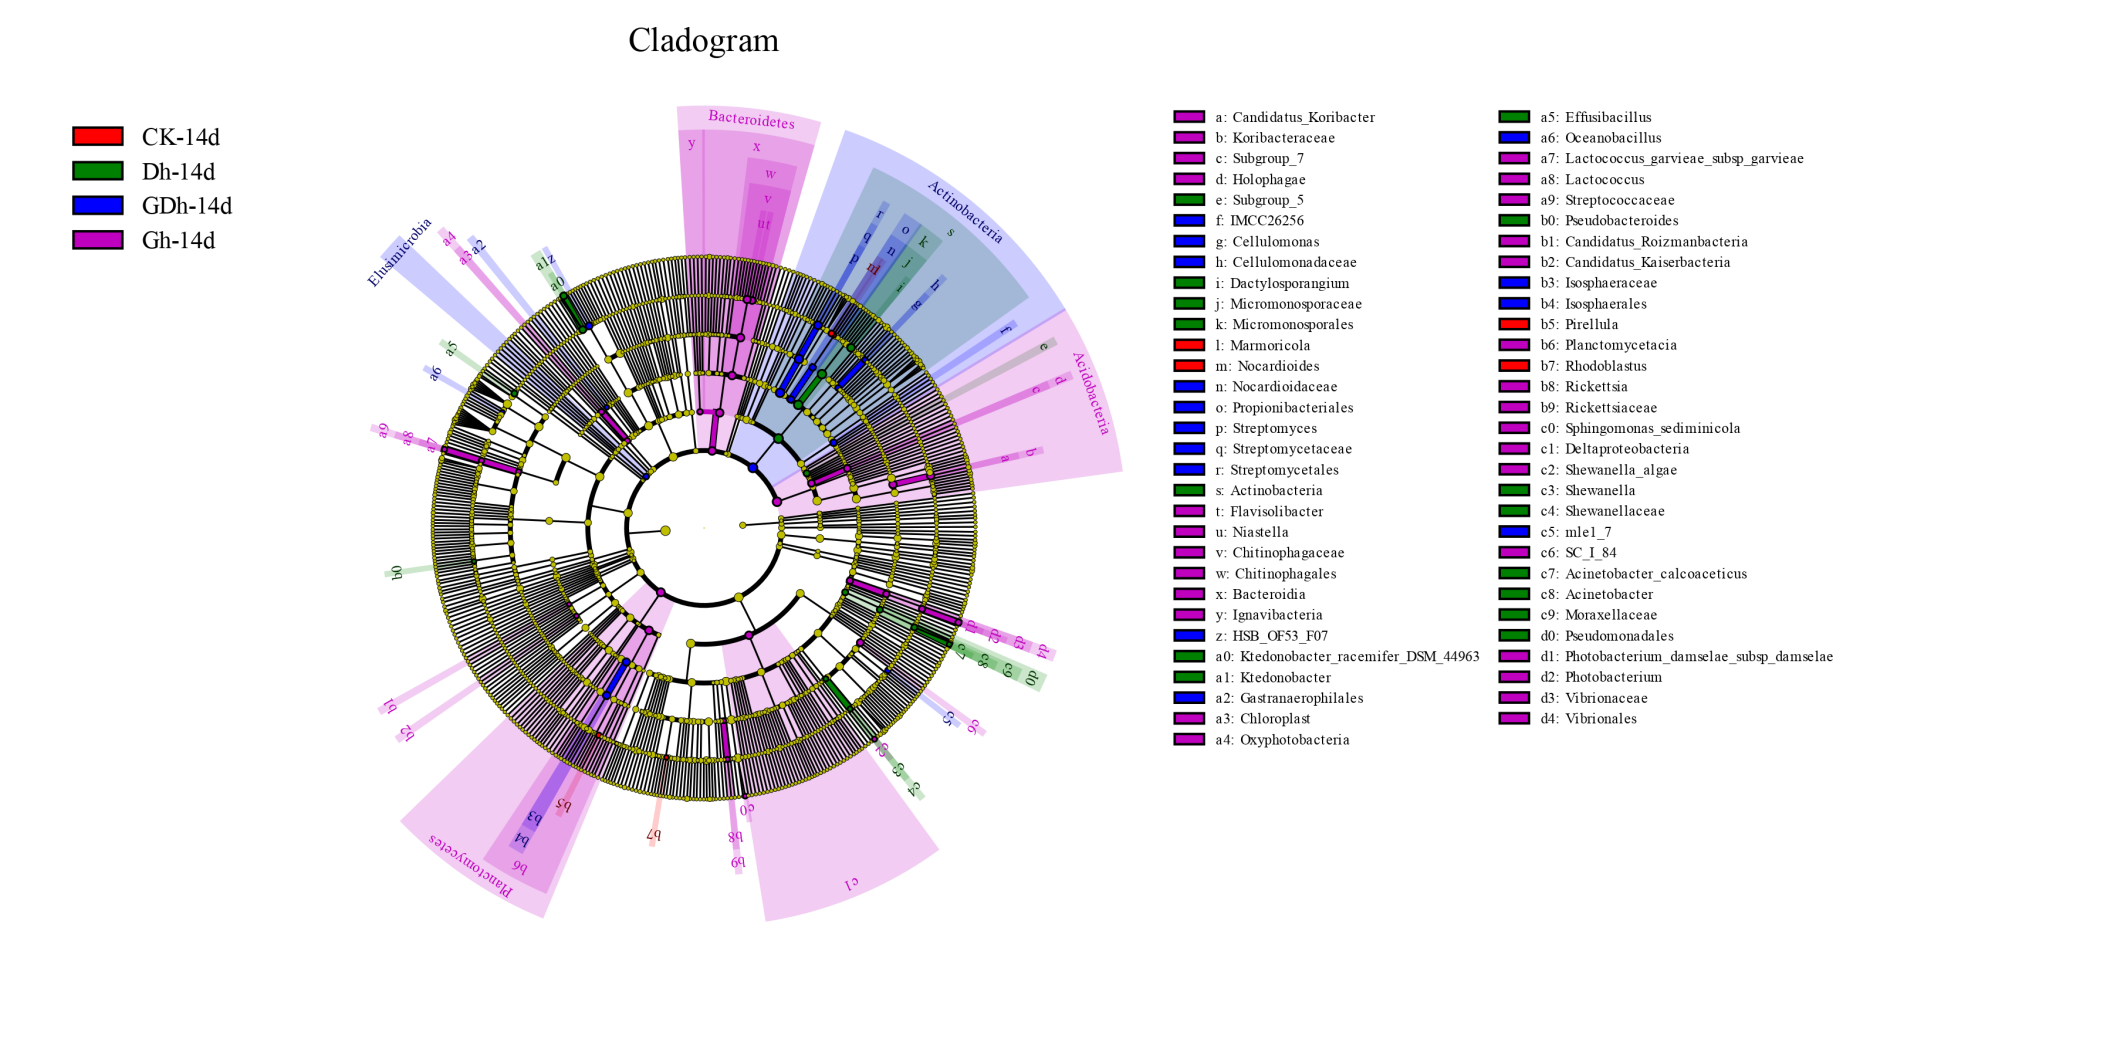


(e)


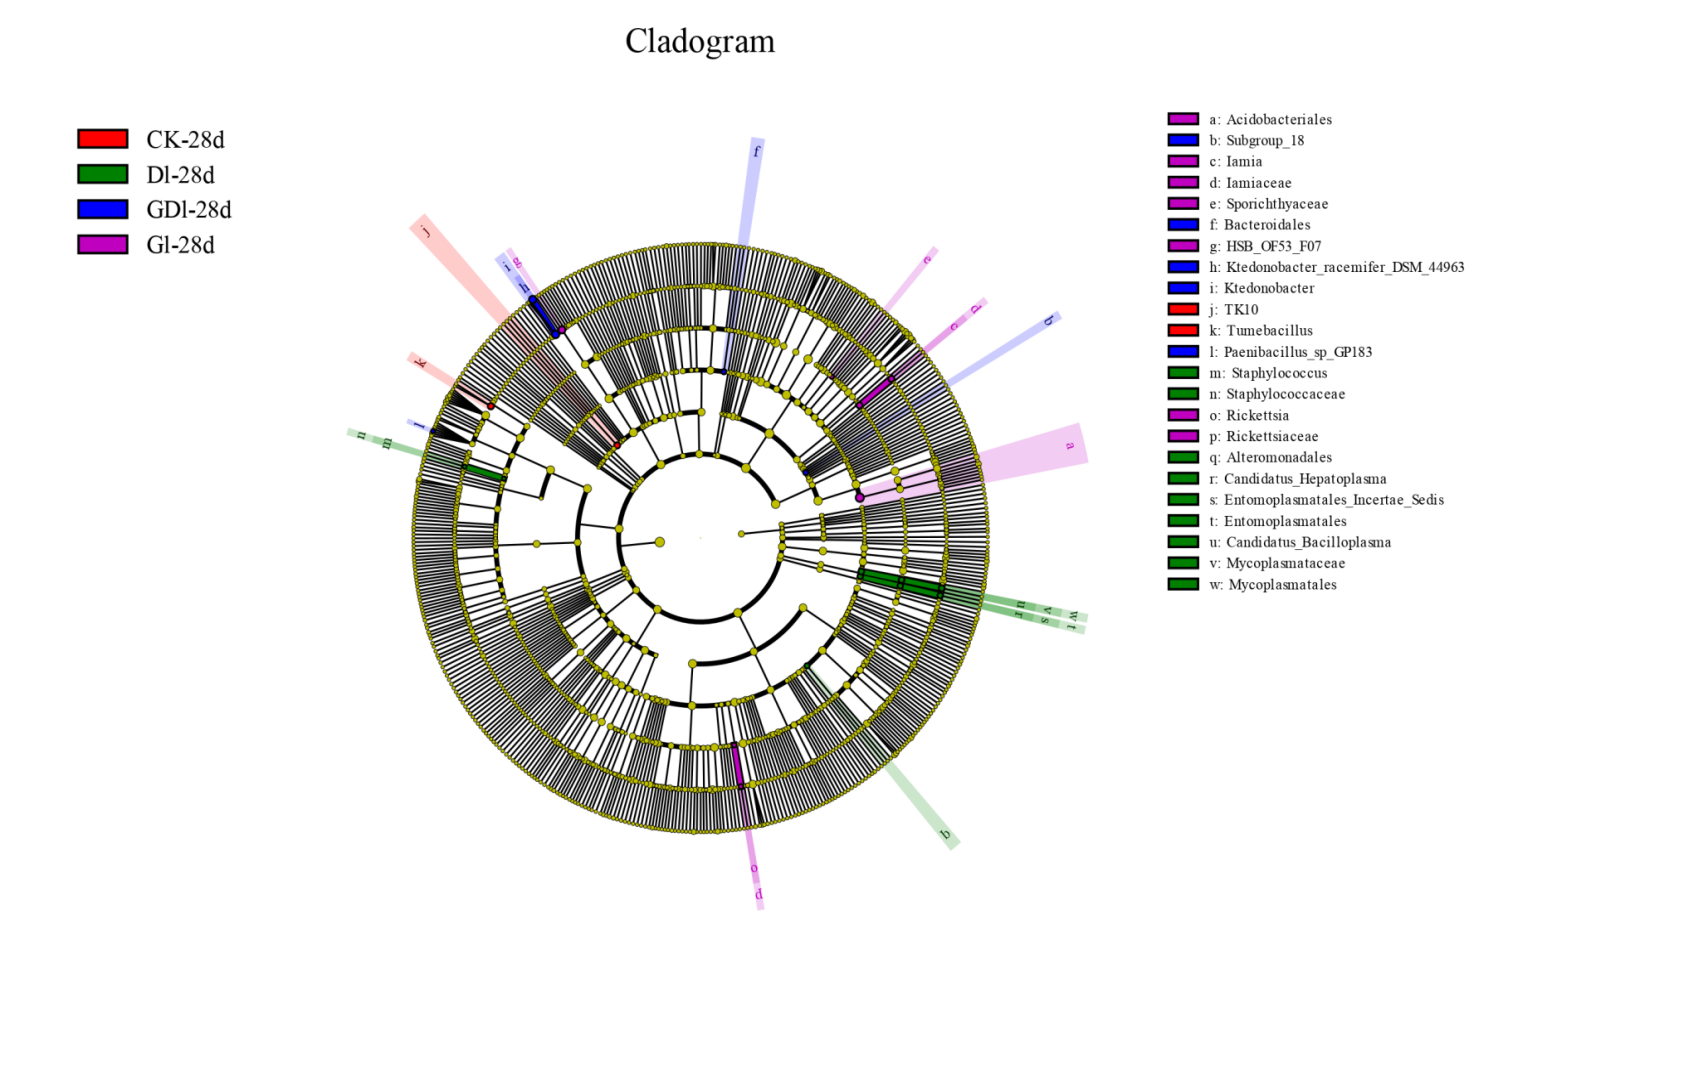


(f)


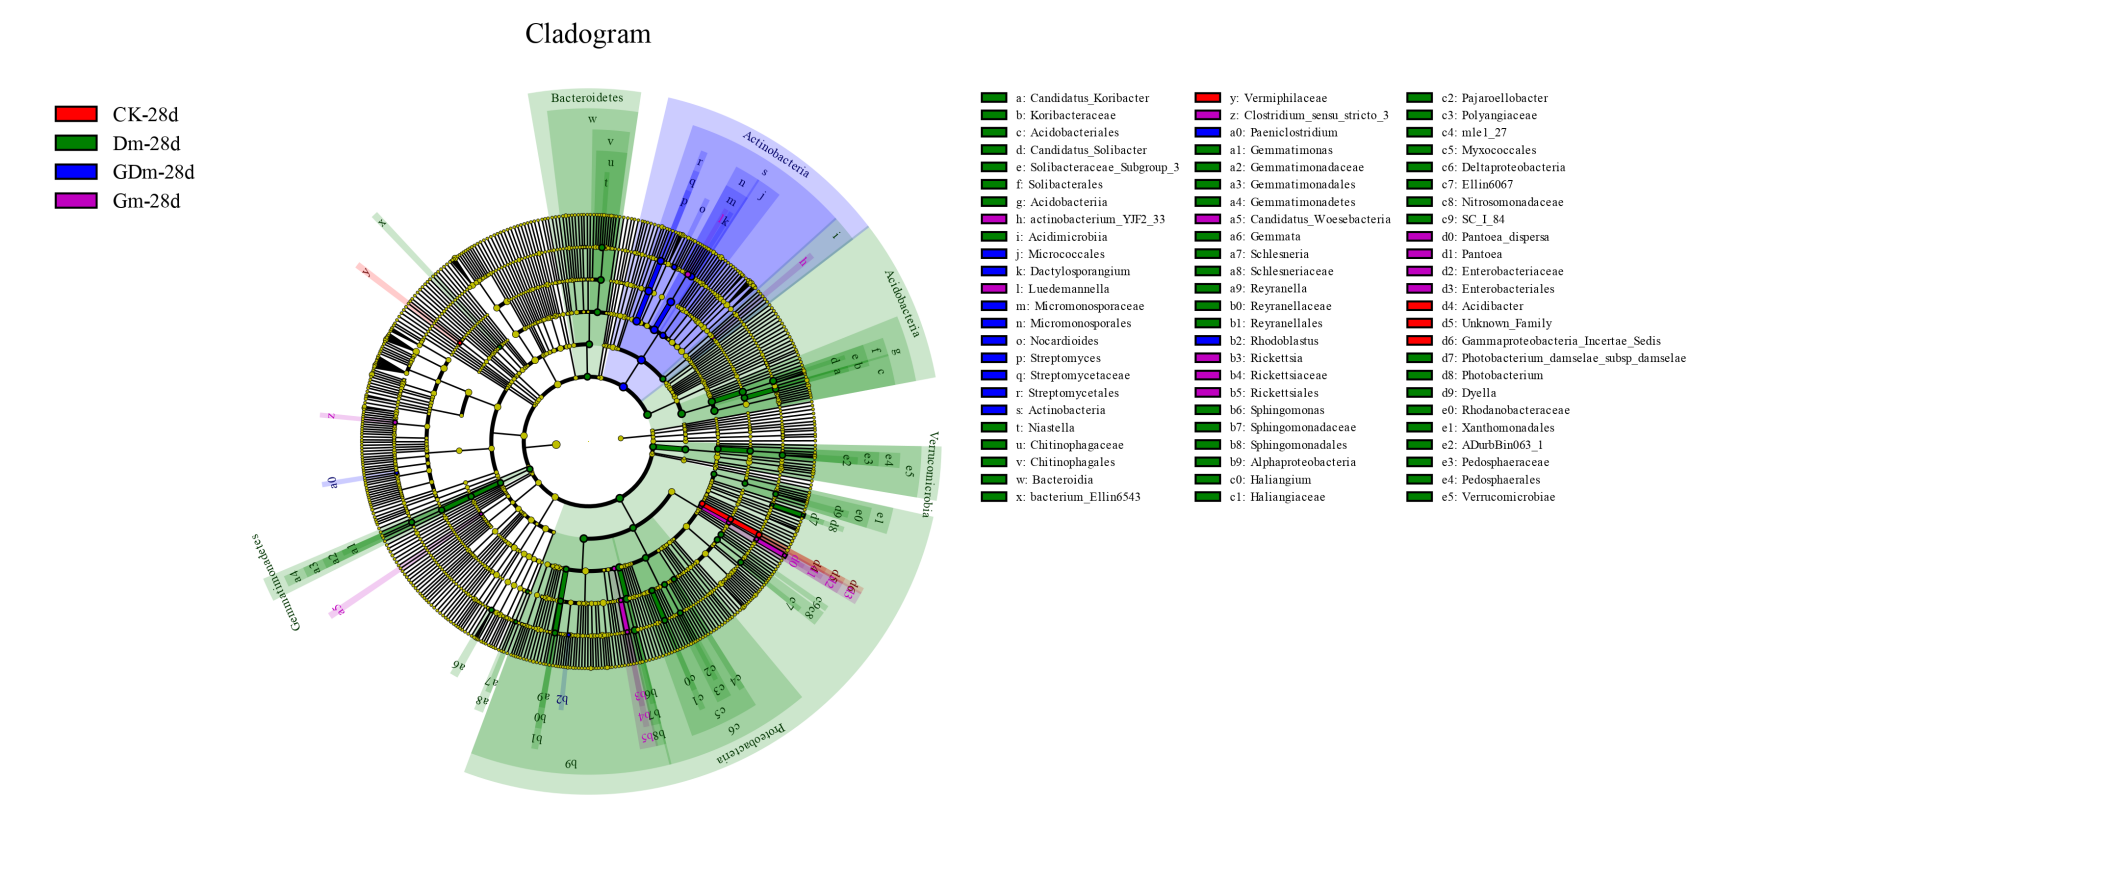


(g)


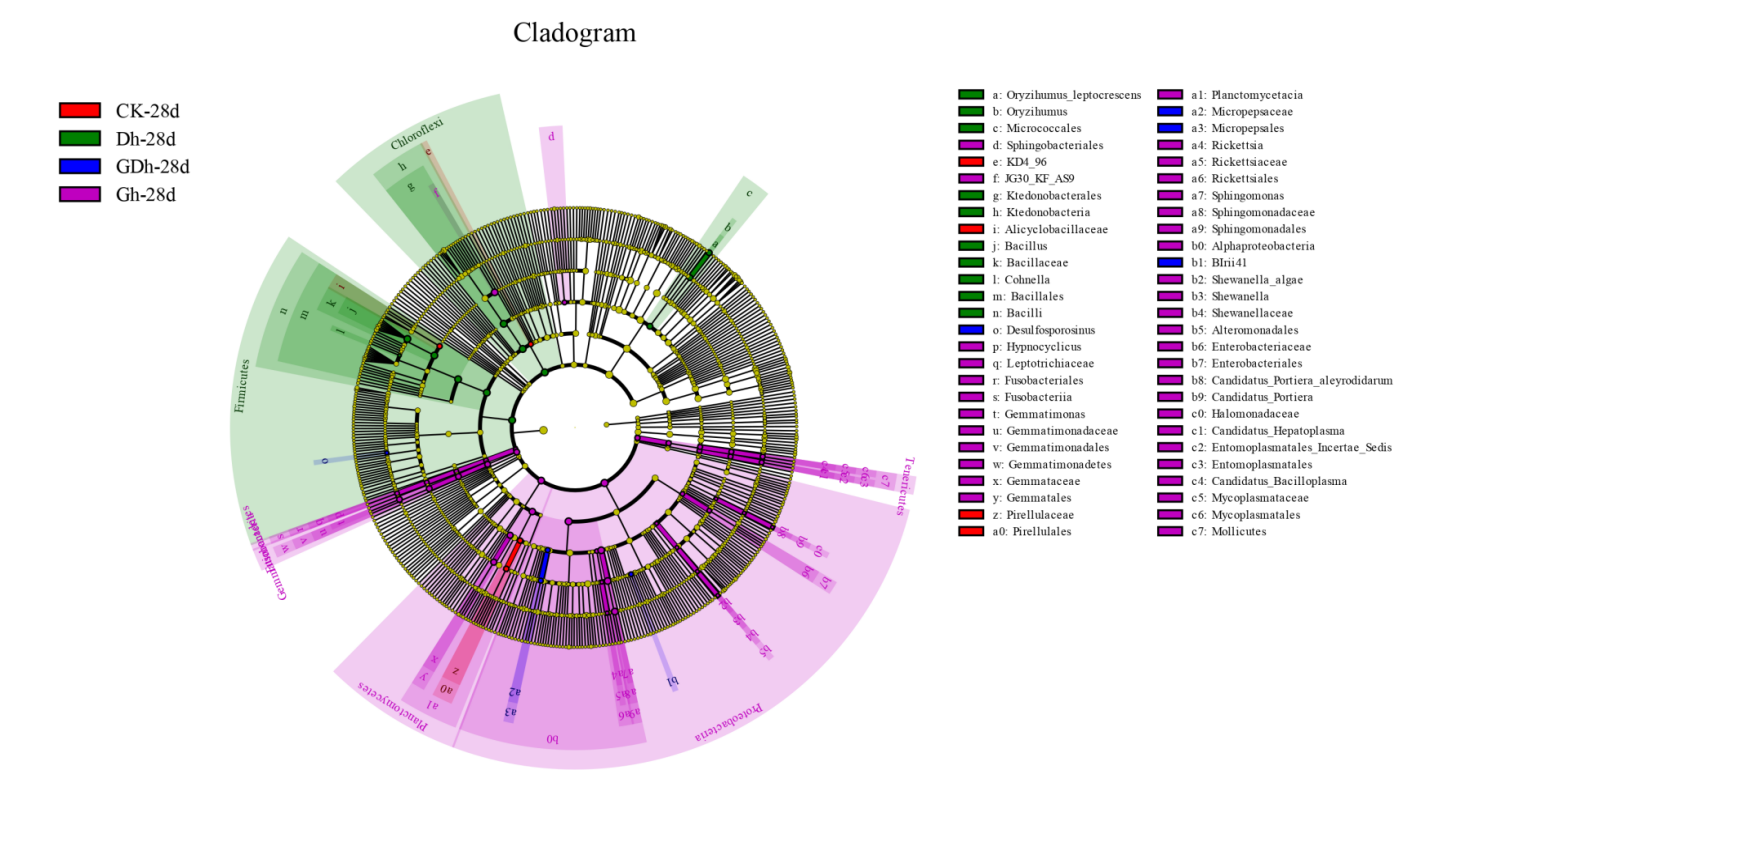


(h)

**Figure S2.** Cladograms of line discriminant analysis effect size (LEfSe) analyses of bacteria.


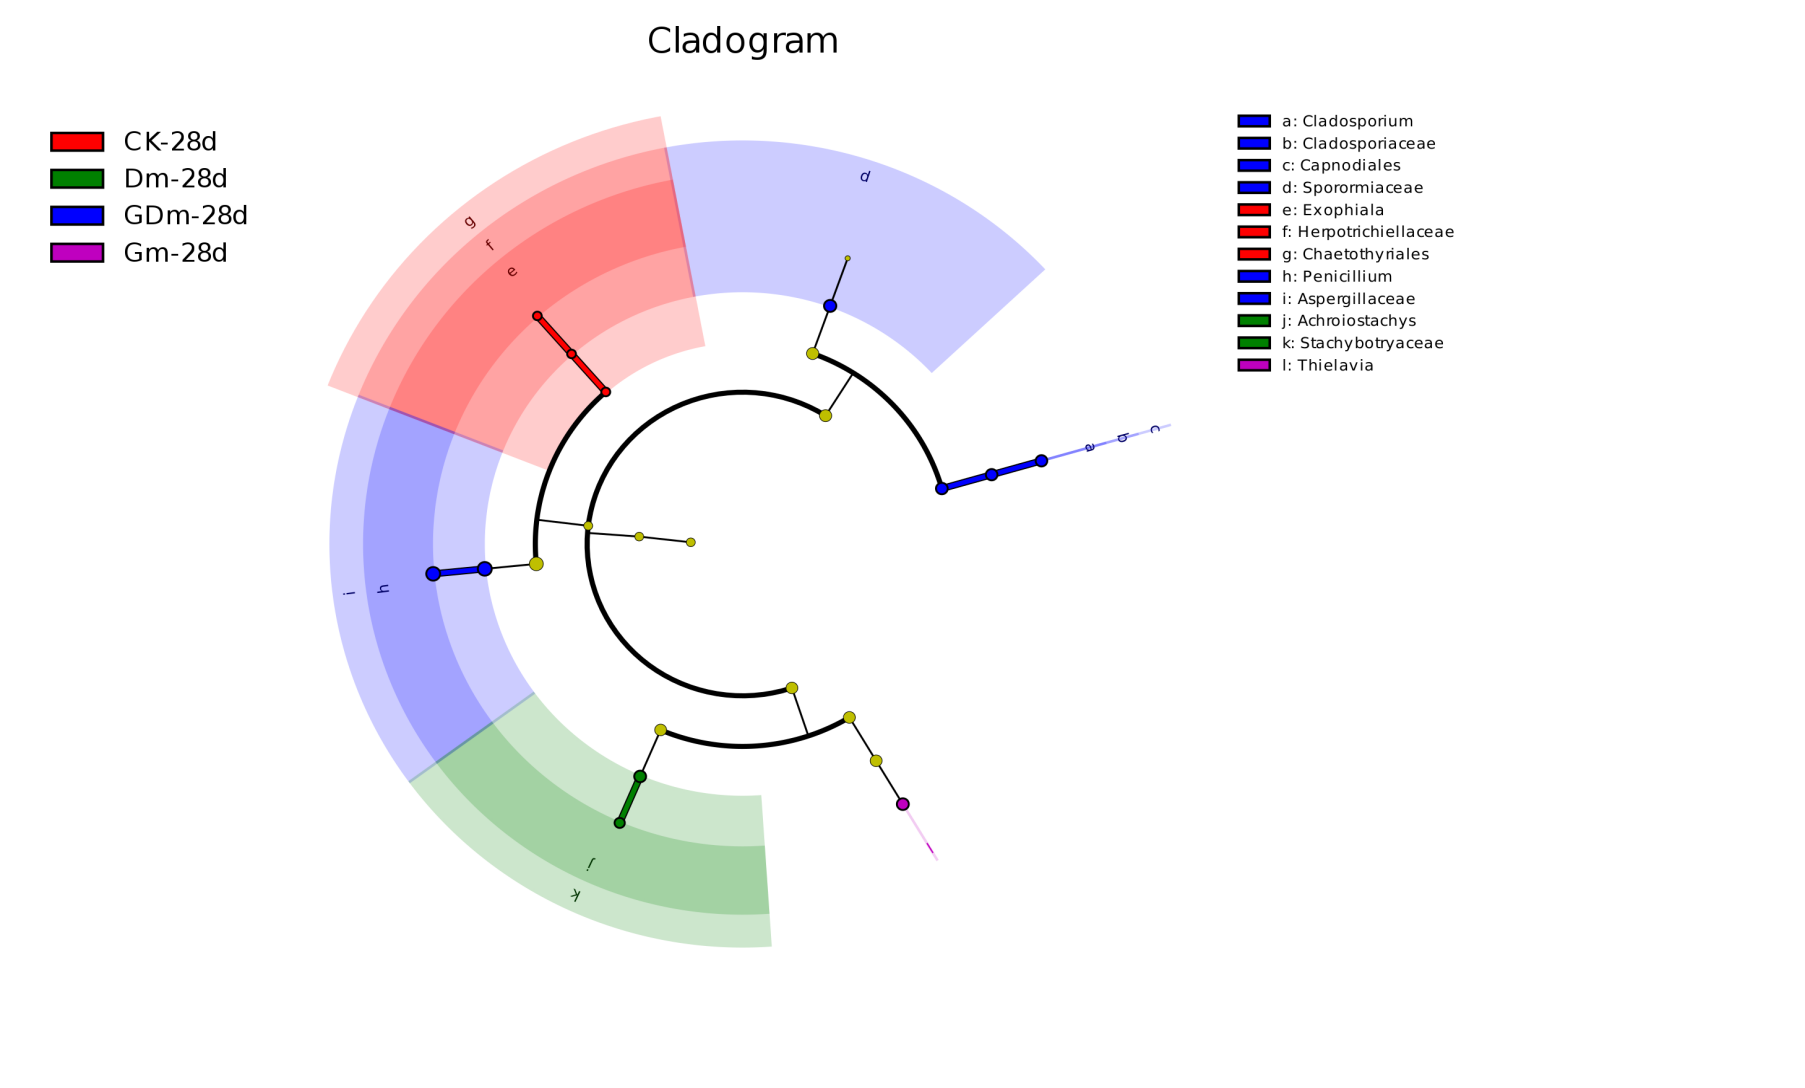


CK-28d

Dm-28d

GDm-28d

Gm-28d

a: Cladosporium

b: Cladosporiaceae

c: Capnodiales

d: Sporormiaceae

e: Exophiala

f: Herpotrichiellaceae

g: Chaetothyriales

h: Penicllium

i: Aspergillaceae

j: Achroiostachys

k: Stachybotryaceae

l: Thielavia

Cladogram

**Figure S3.** Cladograms of line discriminant analysis effect size (LEfSe) analyses of fungus.
